# Supplementary material
Source: publisher site journal article supplement (https://www.dovepress.com/article/341622)
Supplement: Supplementary file 1 [file get_supplementary_file.php]

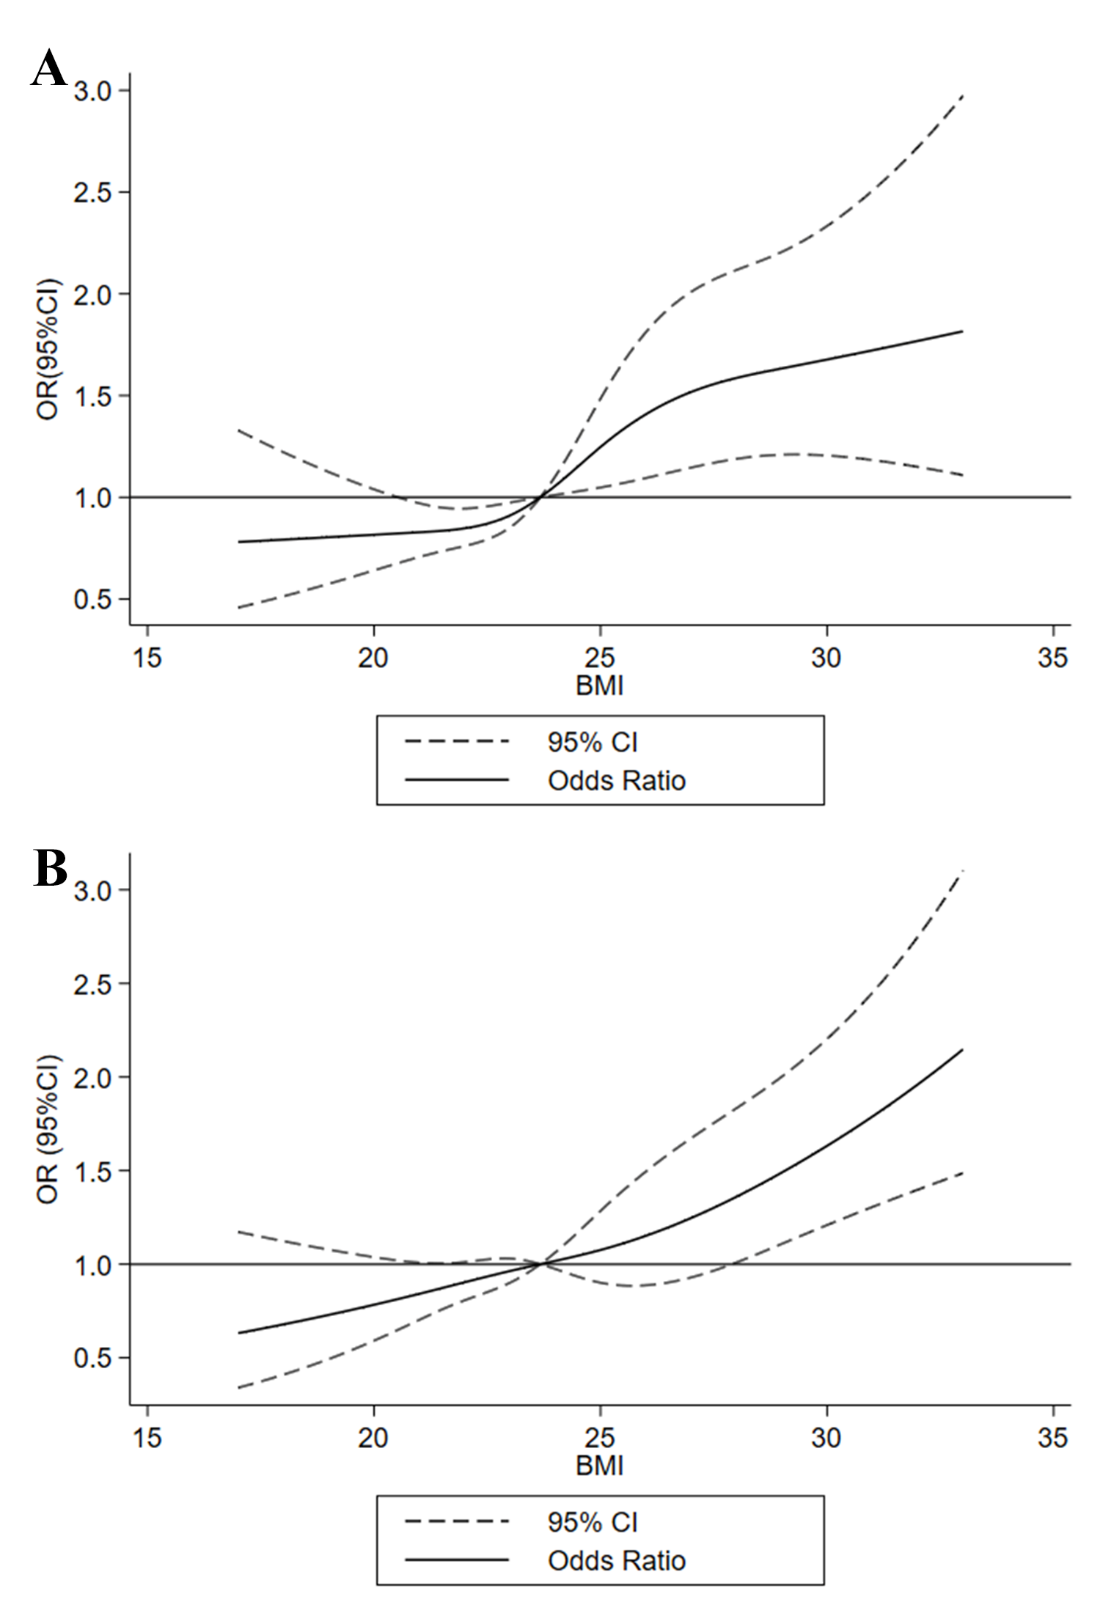


**Figure 1S.** RCS plot of the relationship between BMI and hyperuricemia in male(A) and female (B) participants.


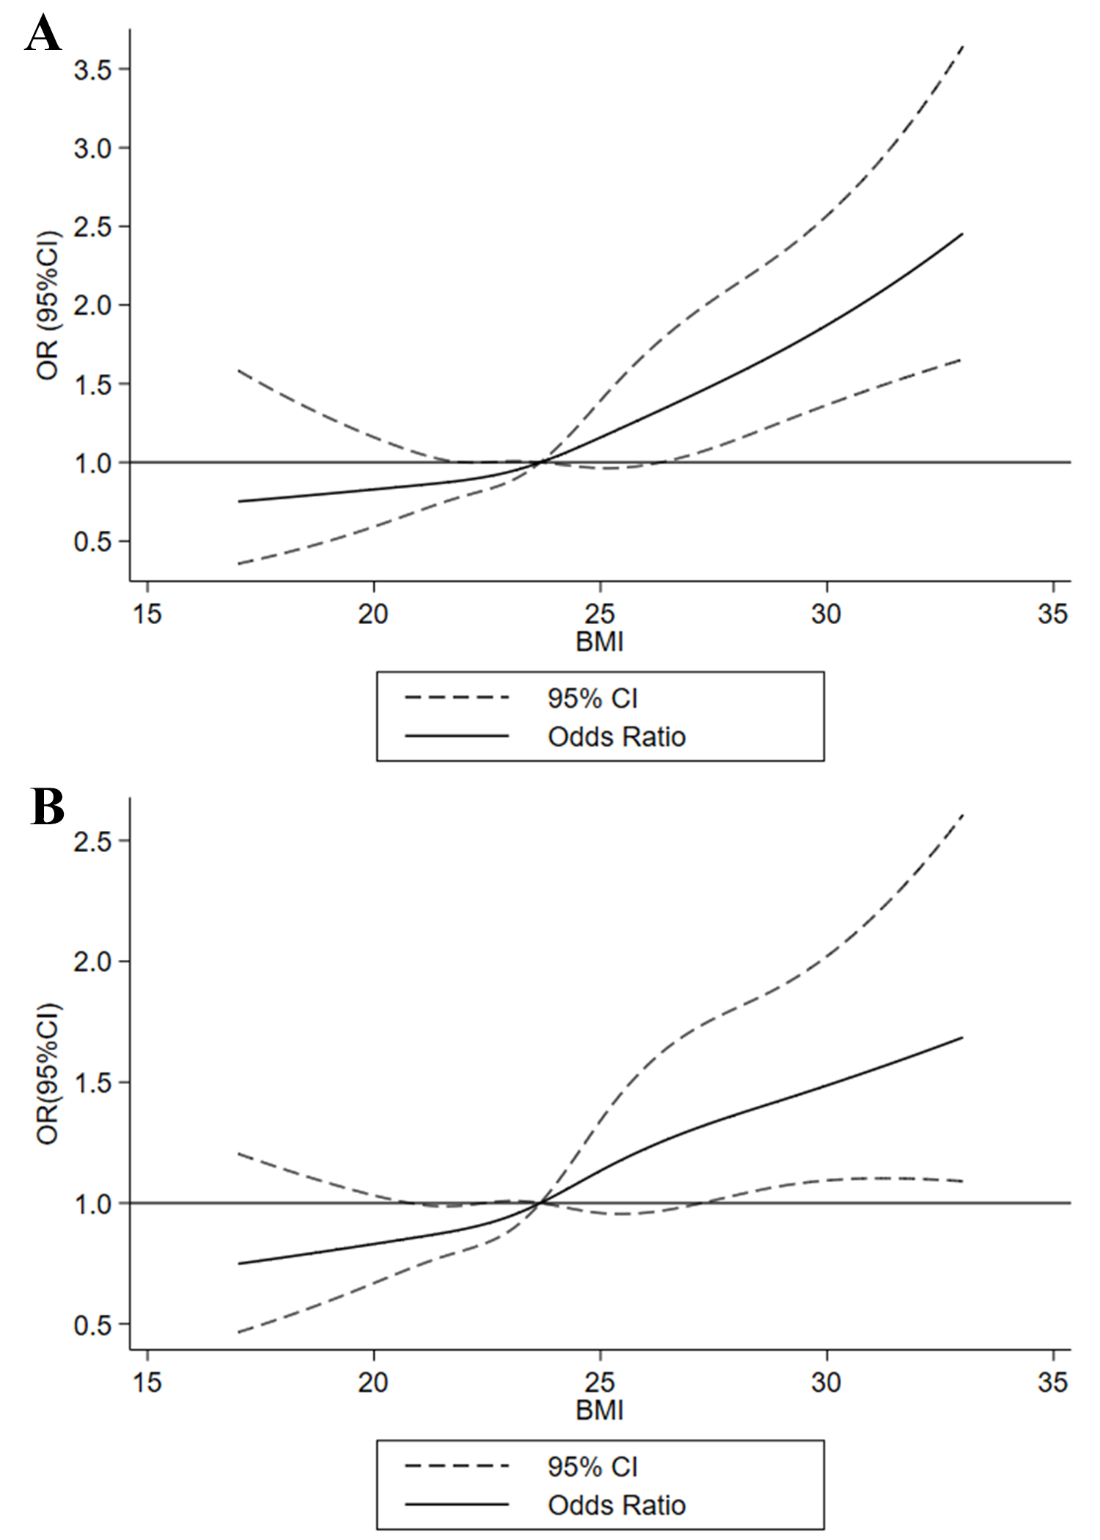


**Figure 2S.** RCS plot of the relationship between BMI and hyperuricemia in middle-aged (A) and older (B) adults.
